# Supplementary material
Source: PubMed Central journal article supplement (PMC6414380)
Supplement: AEM.03029-18-s0001.pdf [file AEM.03029-18-s0001.pdf]

## SUPPLEMENTAL INFORMATION

### Insights into the function of the *N*-acetyltransferase SatA that detoxifies streptothricin in *Bacillus subtilis* and *Bacillus anthracis*

Rachel M. Burckhardt and Jorge C. Escalante-Semerena\*

Department of Microbiology, University of Georgia, Athens

\*Corresponding author: Department of Microbiology, University of Georgia, 212C Biological Sciences Building, 120 Cedar Street, Athens, GA 30602, USA; T: +1(706)-542-2651; F: +1(706)-542-2815; Email: jcescala@uga.edu, URL: [www.escalab.com](http://www.escalab.com)

Running title: Functional analysis of SatA

## SUPPLEMENTAL FIGURES

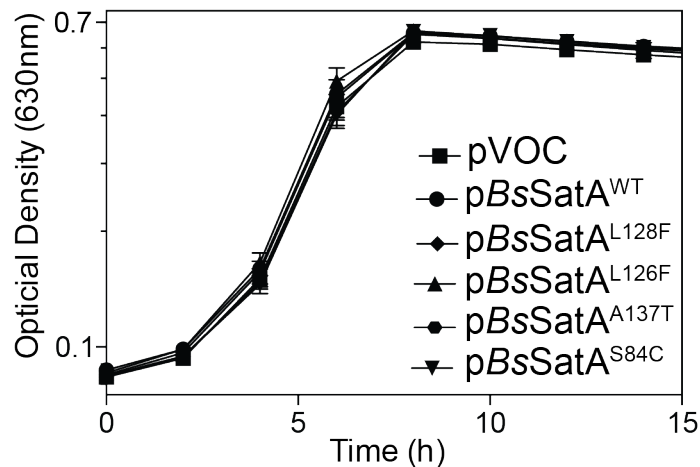

**Figure S1. Variant *B. subtilis* *satA* alleles have no growth defect in *S. enterica*.** Strains carrying wild-type (*satA*<sup>+</sup>, circles), variant *satA* alleles, or empty vector (squares) were grown in glycerol (22 mM) minimal medium (1). All strains carried  $\Delta metE2702 ara-9$  chromosomal mutations and the indicated plasmid: JE22263 (*pCV1*), JE22334 (*pBsSATA1*), JE23884 (*pBsSATA10*), JE23887 (*pBsSATA11*), JE23888 (*pBsSATA12*), JE23889 (*pBsSATA13*). Error bars represent one standard deviation and are present, although in many cases they are too small to be visible.

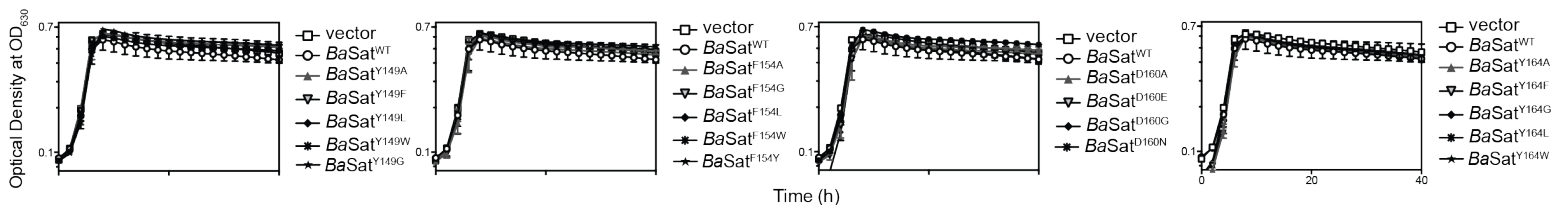

**Figure S2. Mutant *B. anthracis* *satA* alleles have no growth defect in *S. enterica*.** Strains carrying wild-type (*satA*<sup>+</sup>, circles), variant *satA* alleles, or empty vector (squares) were grown in glycerol (22 mM) minimal medium (1) with 250  $\mu$ M L-(+)-arabinose. Error bars represent one standard deviation and are present, although in many cases they are too small to be visible.

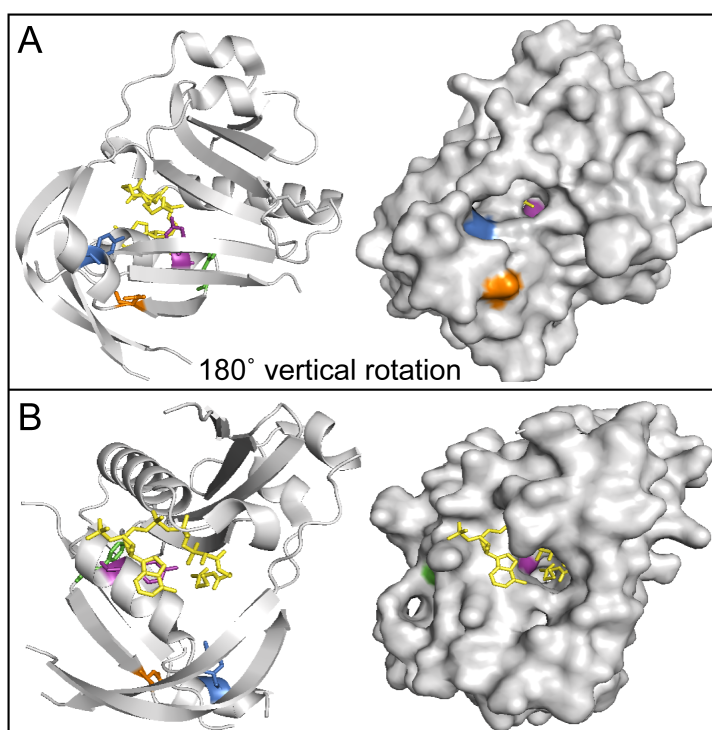

**Figure S3. Surface model of *BaSatA* (PDB 3PP9).** Ribbon (left) or surface (right) model of *BaSatA*. Panels B is a 180° vertical rotation of panel A, intended to display the full surface of the enzyme. Conserved aromatic residues are colored: Y149 (purple), F154 (green), D160 (orange), and Y164 (blue), while AcCoA is shown in yellow.

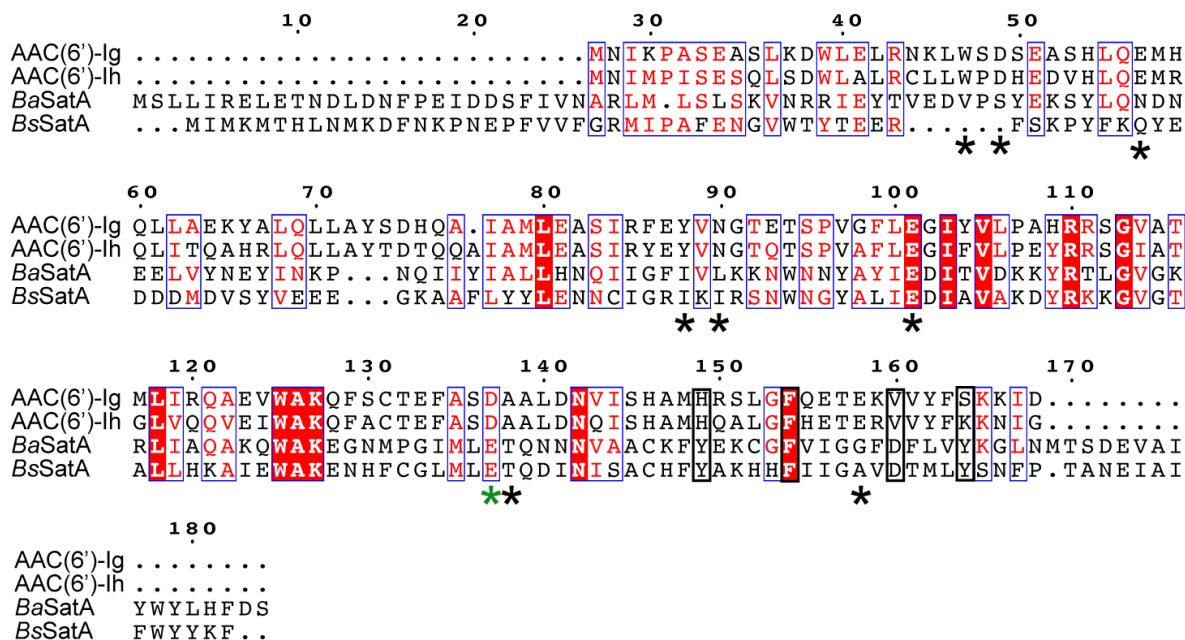

**Figure S4. Alignment of AAC(6') and SatA proteins.** Protein sequences were aligned using Geneious software (2) (<https://www.geneious.com>) and the figure was generated using ESPript (3). Conserved residues are highlighted red while similar residues are boxed. Numbers refer to the residue number of *B. anthracis* SatA. Residues substituted in the *BaSatA* (Y149, F154, D160, and Y164) are outlined in black. Residues of AAC(6')-lg known to bind tobramycin are indicated with asterisks below the residue. The green asterisk corresponds to the putative active site glutamate for SatA and a reported binding site of tobramycin for AAC(6')-lg.

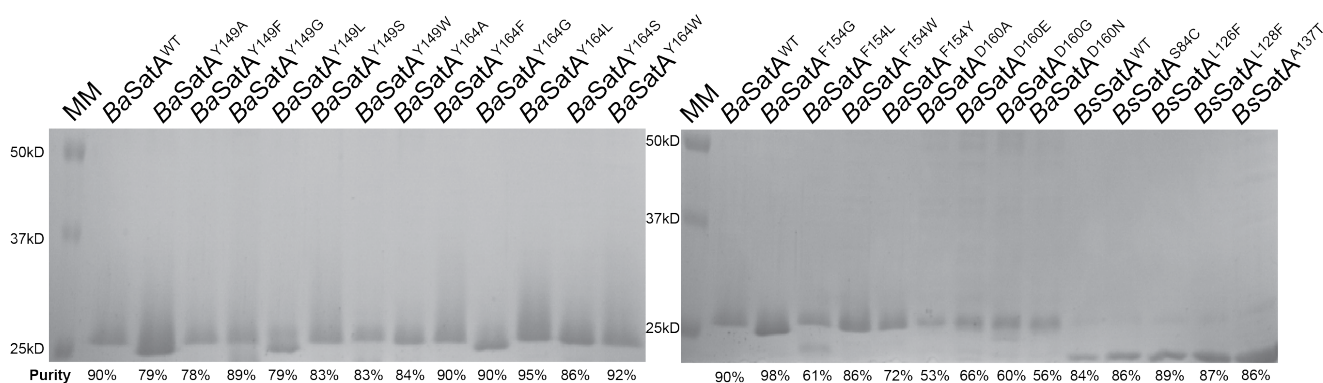

**Figure S5. Assessment of *BsSatA* and *BaSatA* variants purity.** Samples of each variant were run on SDS-PAGE, followed by staining with Coomassie Brilliant Blue R. Protein purity was calculated by running various dilutions of proteins on a separate 12% SDS-PAGE gel and bands were quantified using Total Lab software (4). MM stands for molecular mass marker.

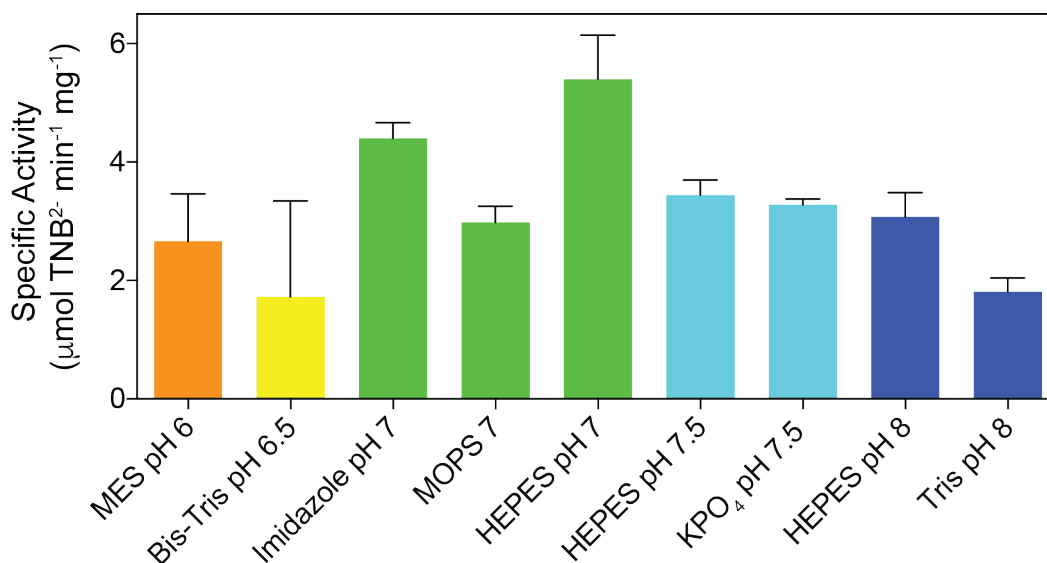

**Figure S6. *BaSatA* *in vitro* activity is highest in HEPES buffer.** Various buffers (50 mM) were used to determine the specific activity of *BaSatA* under saturating conditions (10 μM streptothricin and 500 μM AcCoA) using a continuous DTNB spectrophotometric assay (5) as described in the *Material and Methods*. Abbreviations: MES (2-(*N*-morpholino)ethanesulfonic acid), Bis-Tris (Bis(2-hydroxyethyl)amino-tris(hydroxymethyl)methane), MOPS (3-(*N*-morpholino)propanesulfonic acid), HEPES (4-(2-hydroxyethyl)-1-piperazineethanesulfonic acid), and Tris (*tris*(hydroxymethyl)aminomethane).

## REFERENCES

1. Berkowitz D, Hushon JM, Whitfield HJ, Jr., Roth J, Ames BN. 1968. Procedure for identifying nonsense mutations. *J Bacteriol* 96:215-220.
2. Kearse M, Moir R, Wilson A, Stones-Havas S, Cheung M, Sturrock S, Buxton S, Cooper A, Markowitz S, Duran C, Thierer T, Ashton B, Meintjes P, Drummond A. 2012. Geneious Basic: an integrated and extendable desktop software platform for the organization and analysis of sequence data. *Bioinformatics* 28:1647-1649.
3. Gouet P, Courcelle E, Stuart DI, Metoz F. 1999. ESPript: multiple sequence alignments in PostScript. *Bioinformatics* 15:305-308.
4. Sasse J. 1991. Detection of proteins, p 10.6.1-10.6.8. *In* Ausubel FA, Brent R, Kingston RE, Moore DD, Seidman JG, Smith JA, Struhl K (ed), *Curr Protoc Mol Biol*, vol 1. Wiley Interscience, New York.
5. Eyer P, Worek F, Kiderlen D, Sinko G, Stuglin A, Simeon-Rudolf V, Reiner E. 2003. Molar absorption coefficients for the reduced Ellman reagent: reassessment. *Anal Biochem* 312:224-227.
